# Supplementary material
Source: MDPI journal article supplement (https://www.mdpi.com/1999-4907/6/11/4072)
Supplement: s1 [file s1]

Supplementary Information


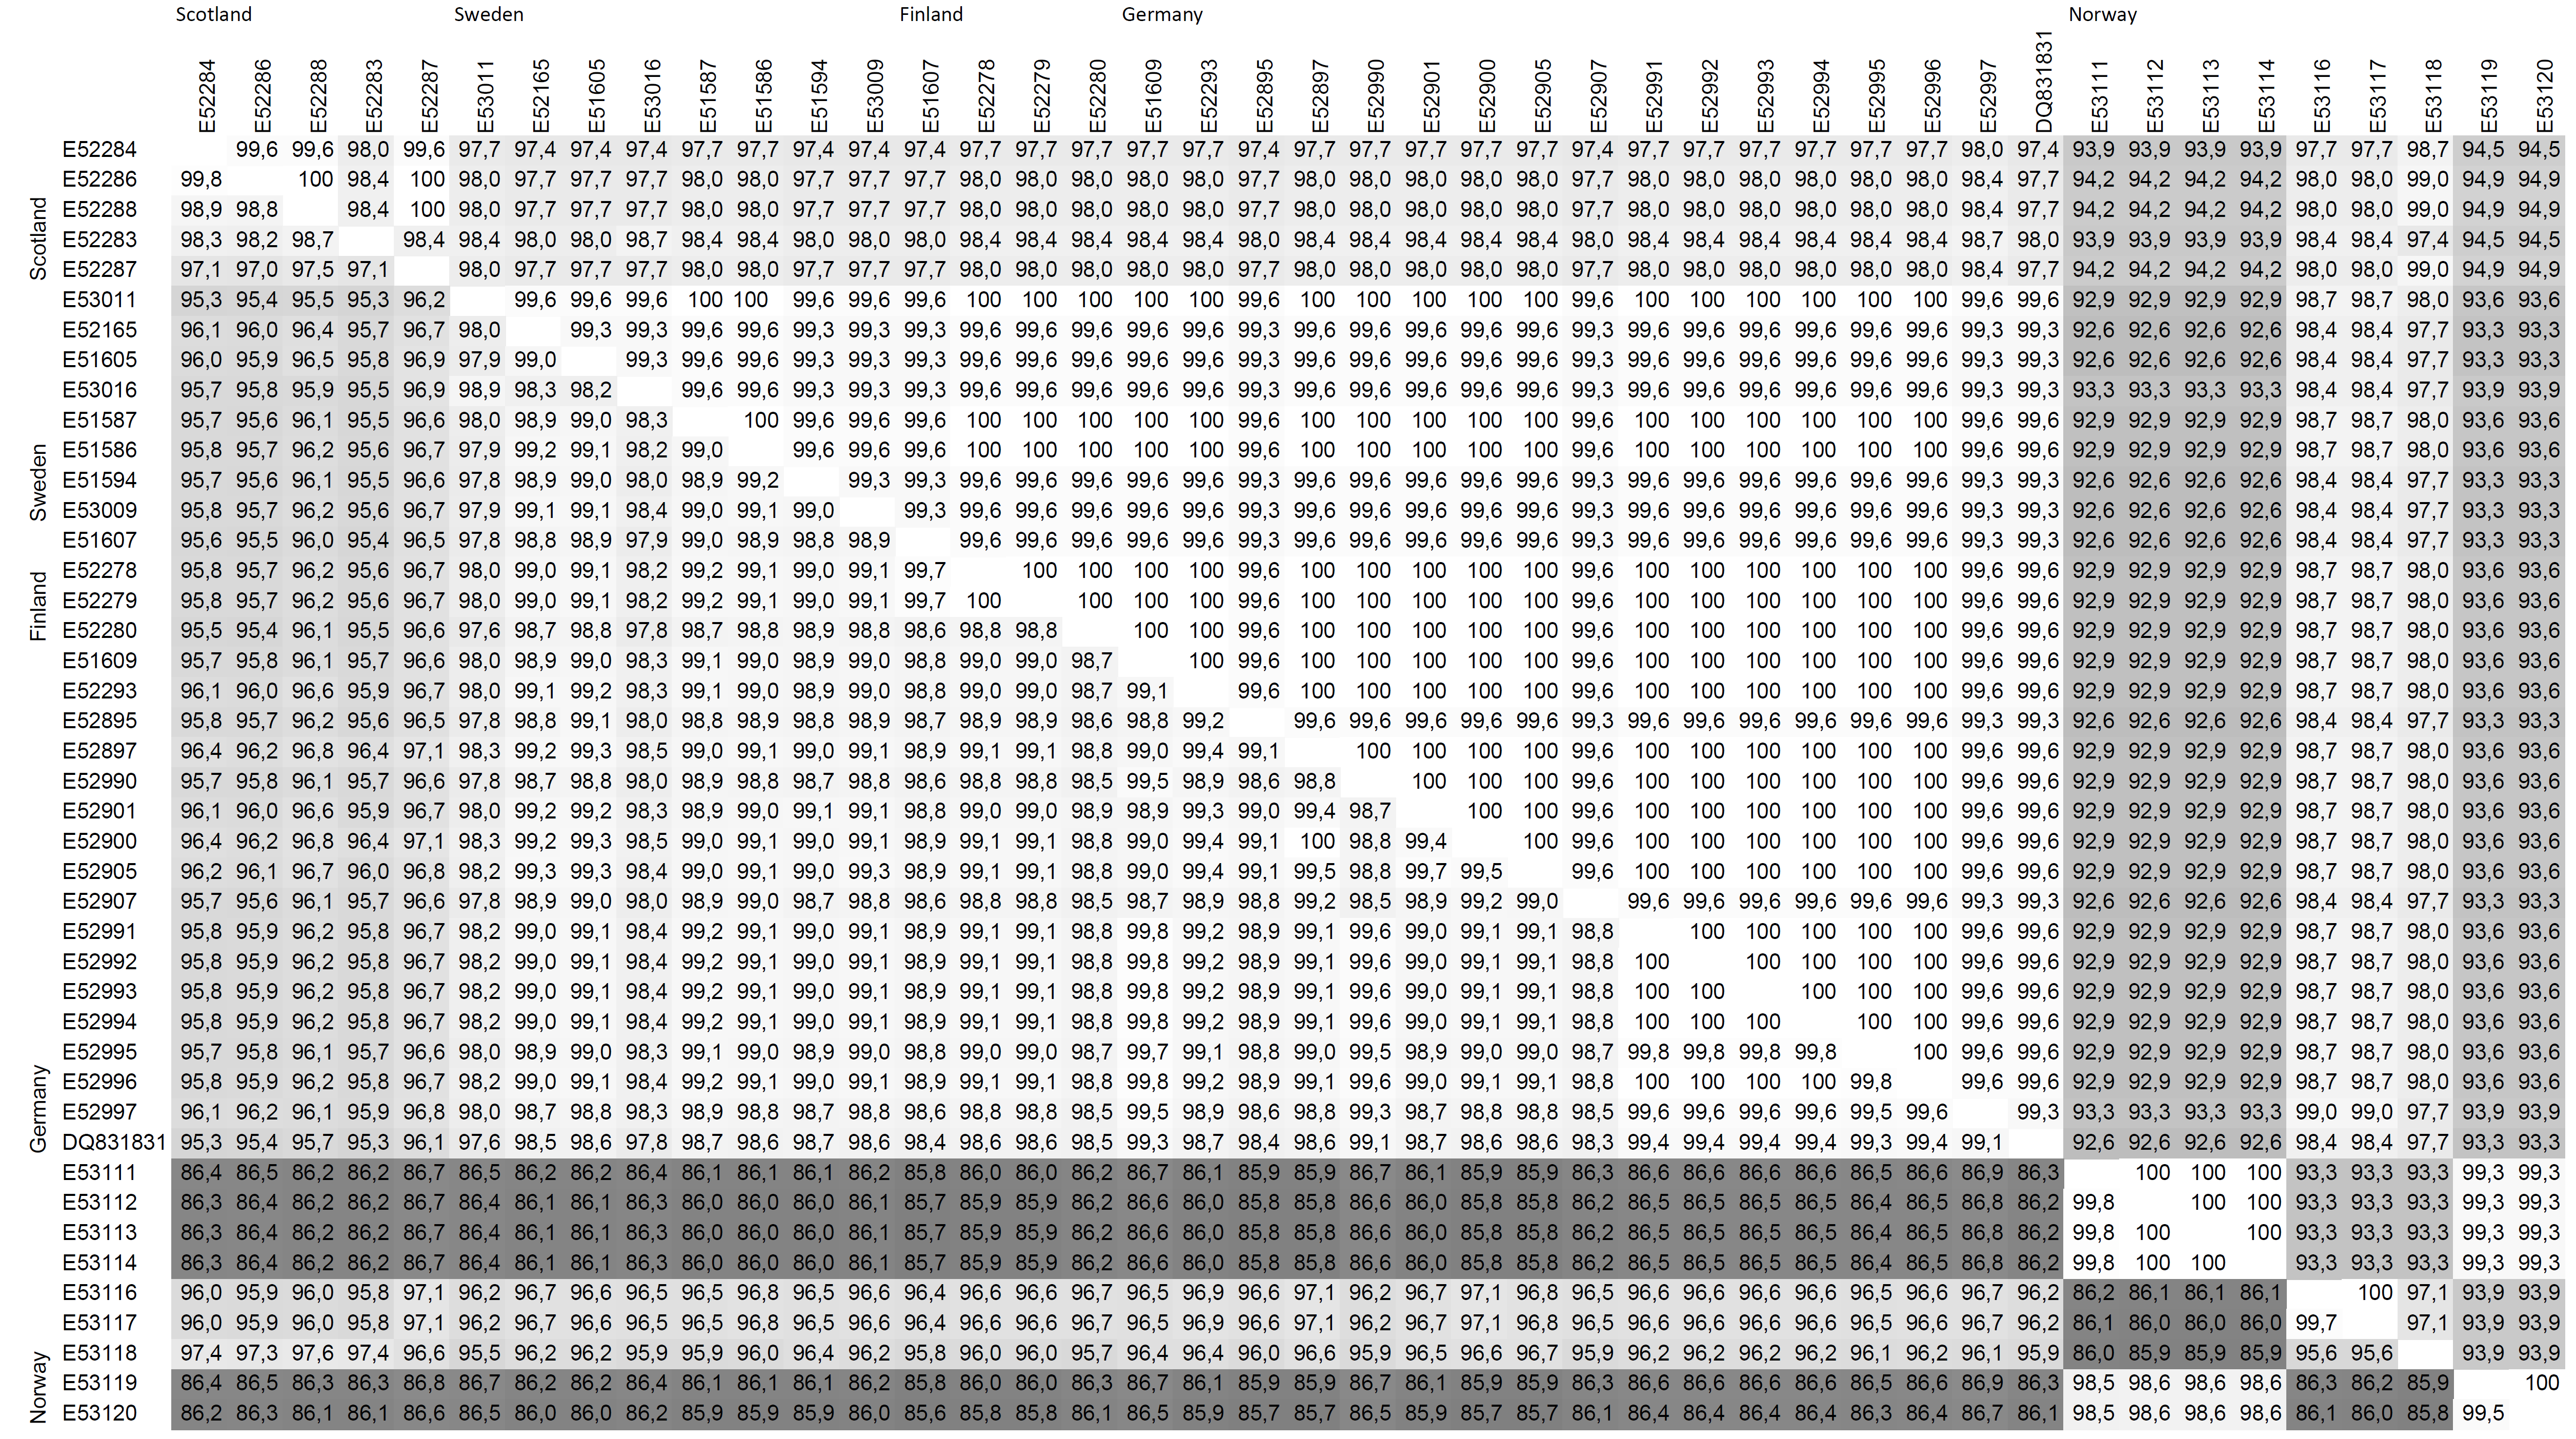


**Figure S1.** Nucleotide sequence identity matrix of nucleocapsid protein p3 (lower diagonal), and amino acid sequence identity matrix of nucleocapsid protein p3 (upper diagonal) of *European mountain ash ringspot-associated virus*; low values in grey, high values in white.


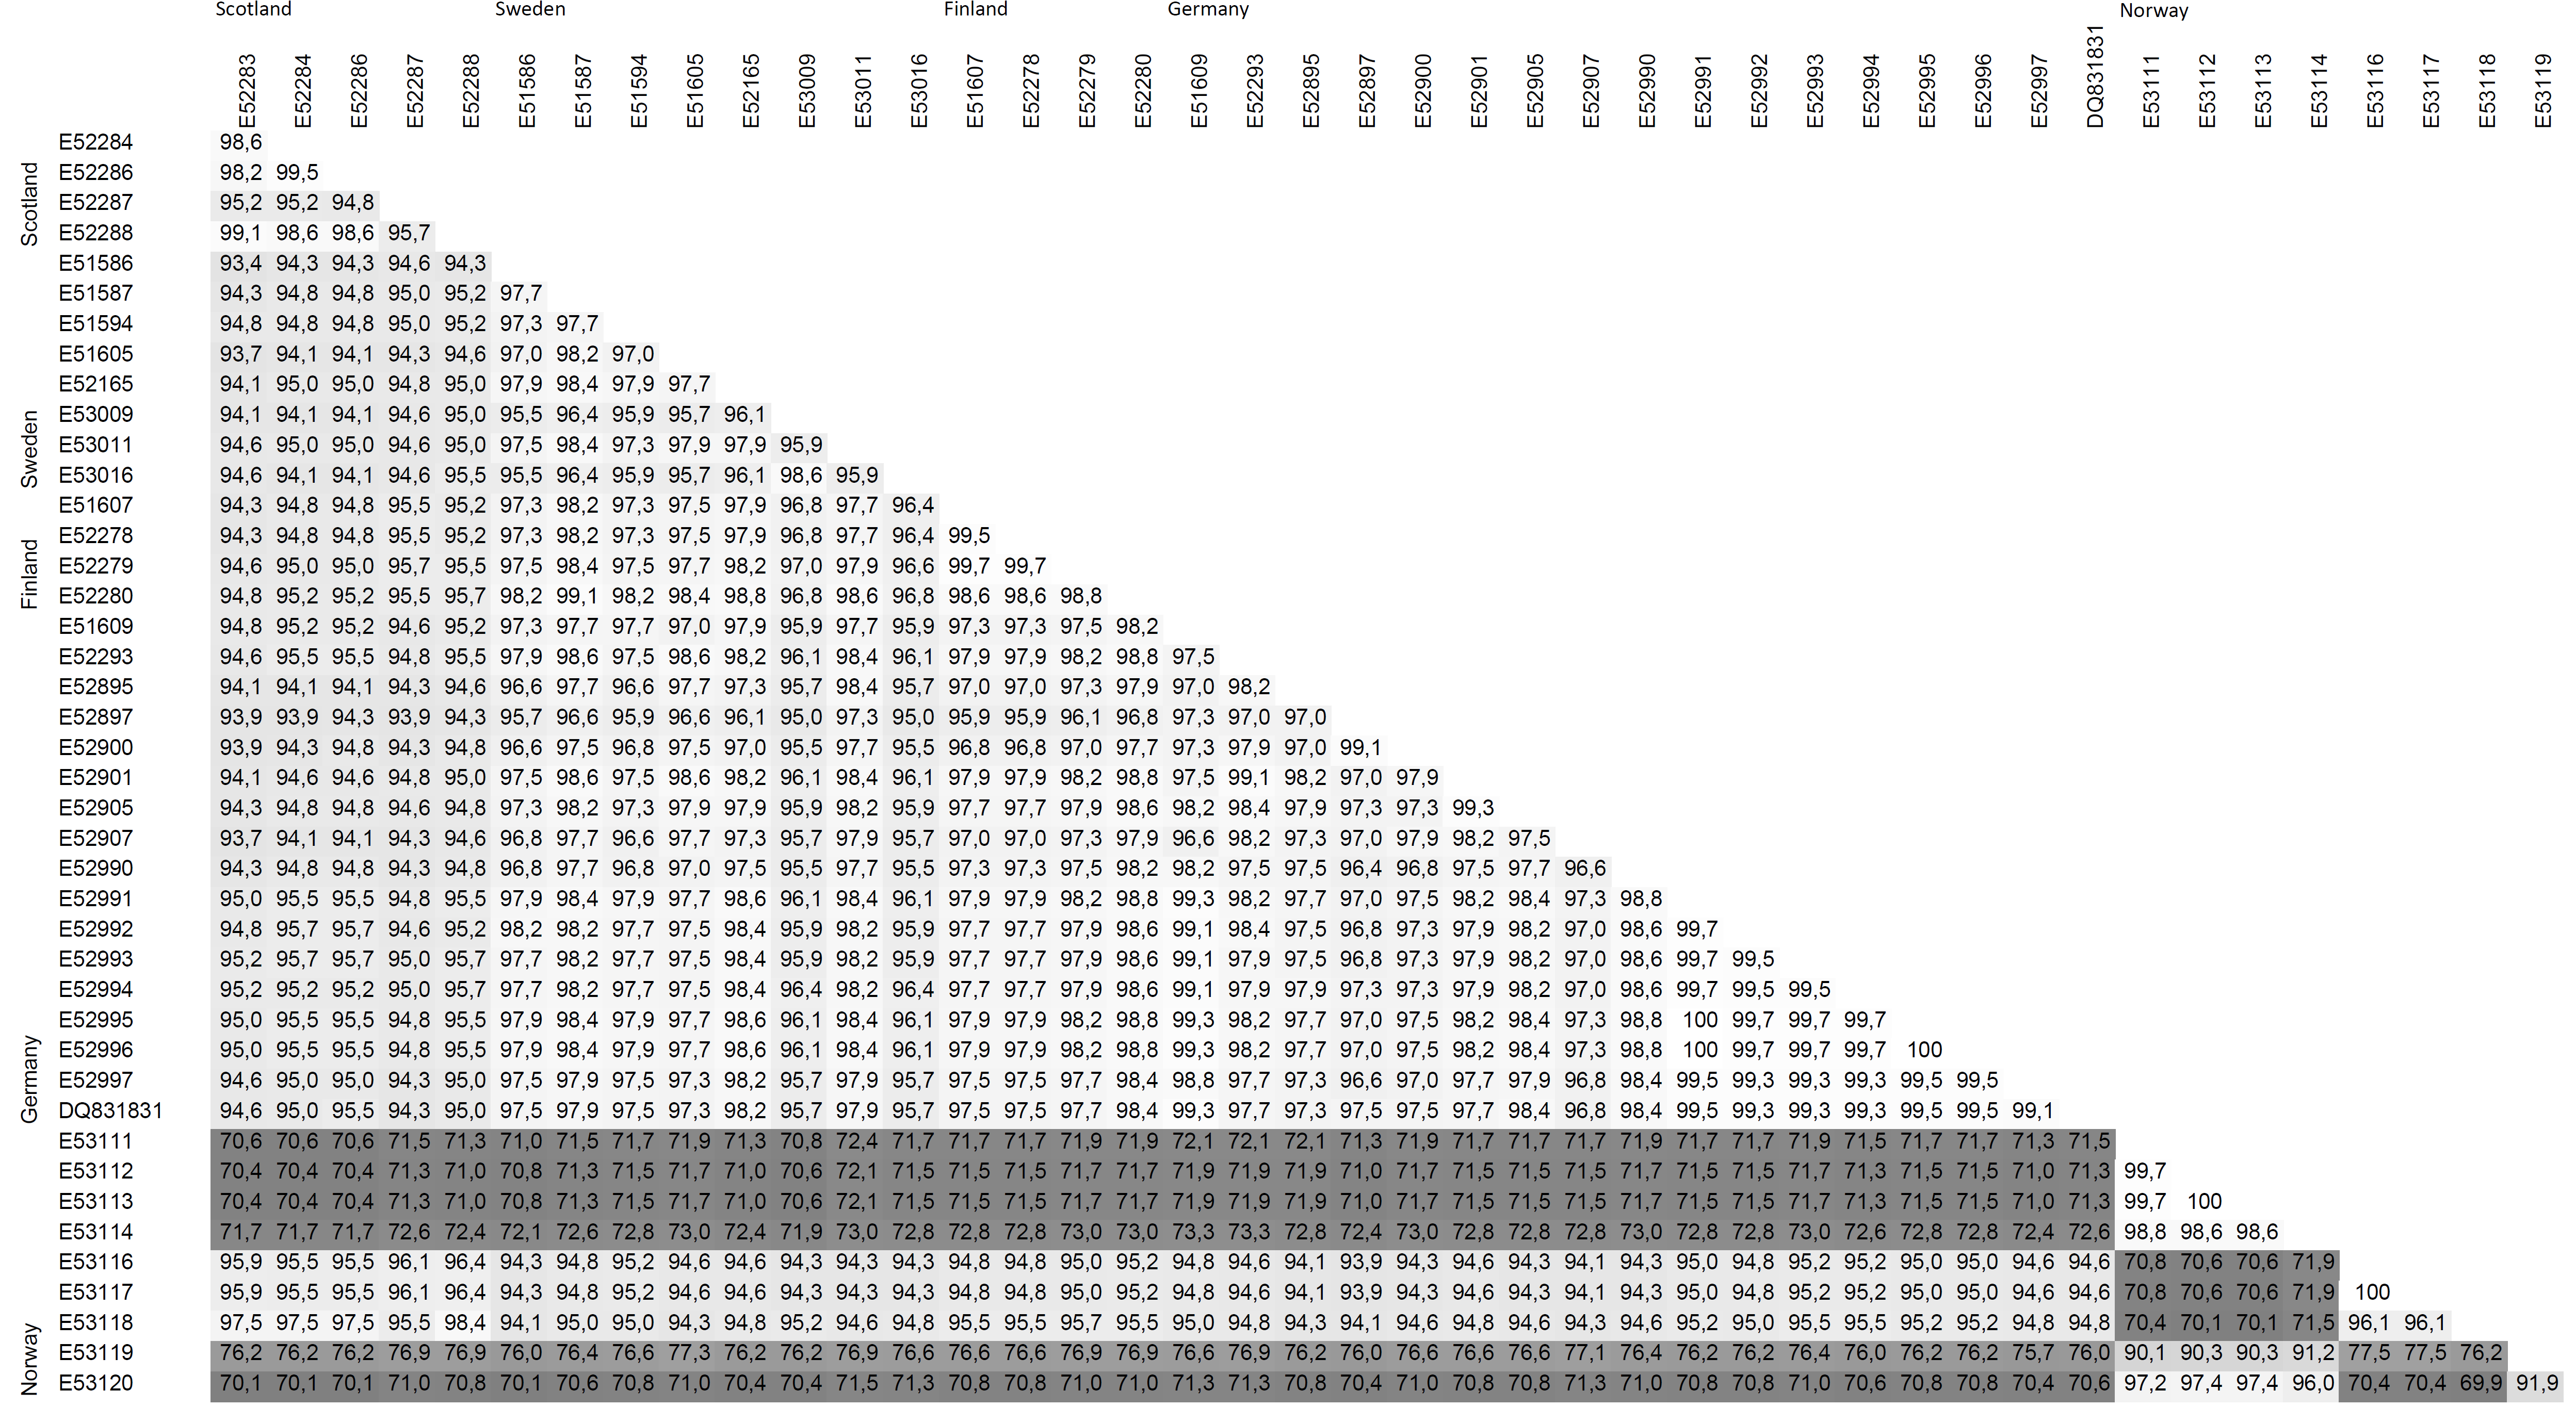


**Figure S2.** Nucleotide sequence identity matrix of RNA3 3´ untranslated region (lower diagonal, in white) of *European mountain ash
ringspot-associated virus*; low values in grey, high values in white.

**Figure S3.** Nucleotide sequence identity matrix of RNA3 5′ untranslated region (lower diagonal, in white) of *European mountain ash
ringspot-associated virus*; low values in grey, high values in white.


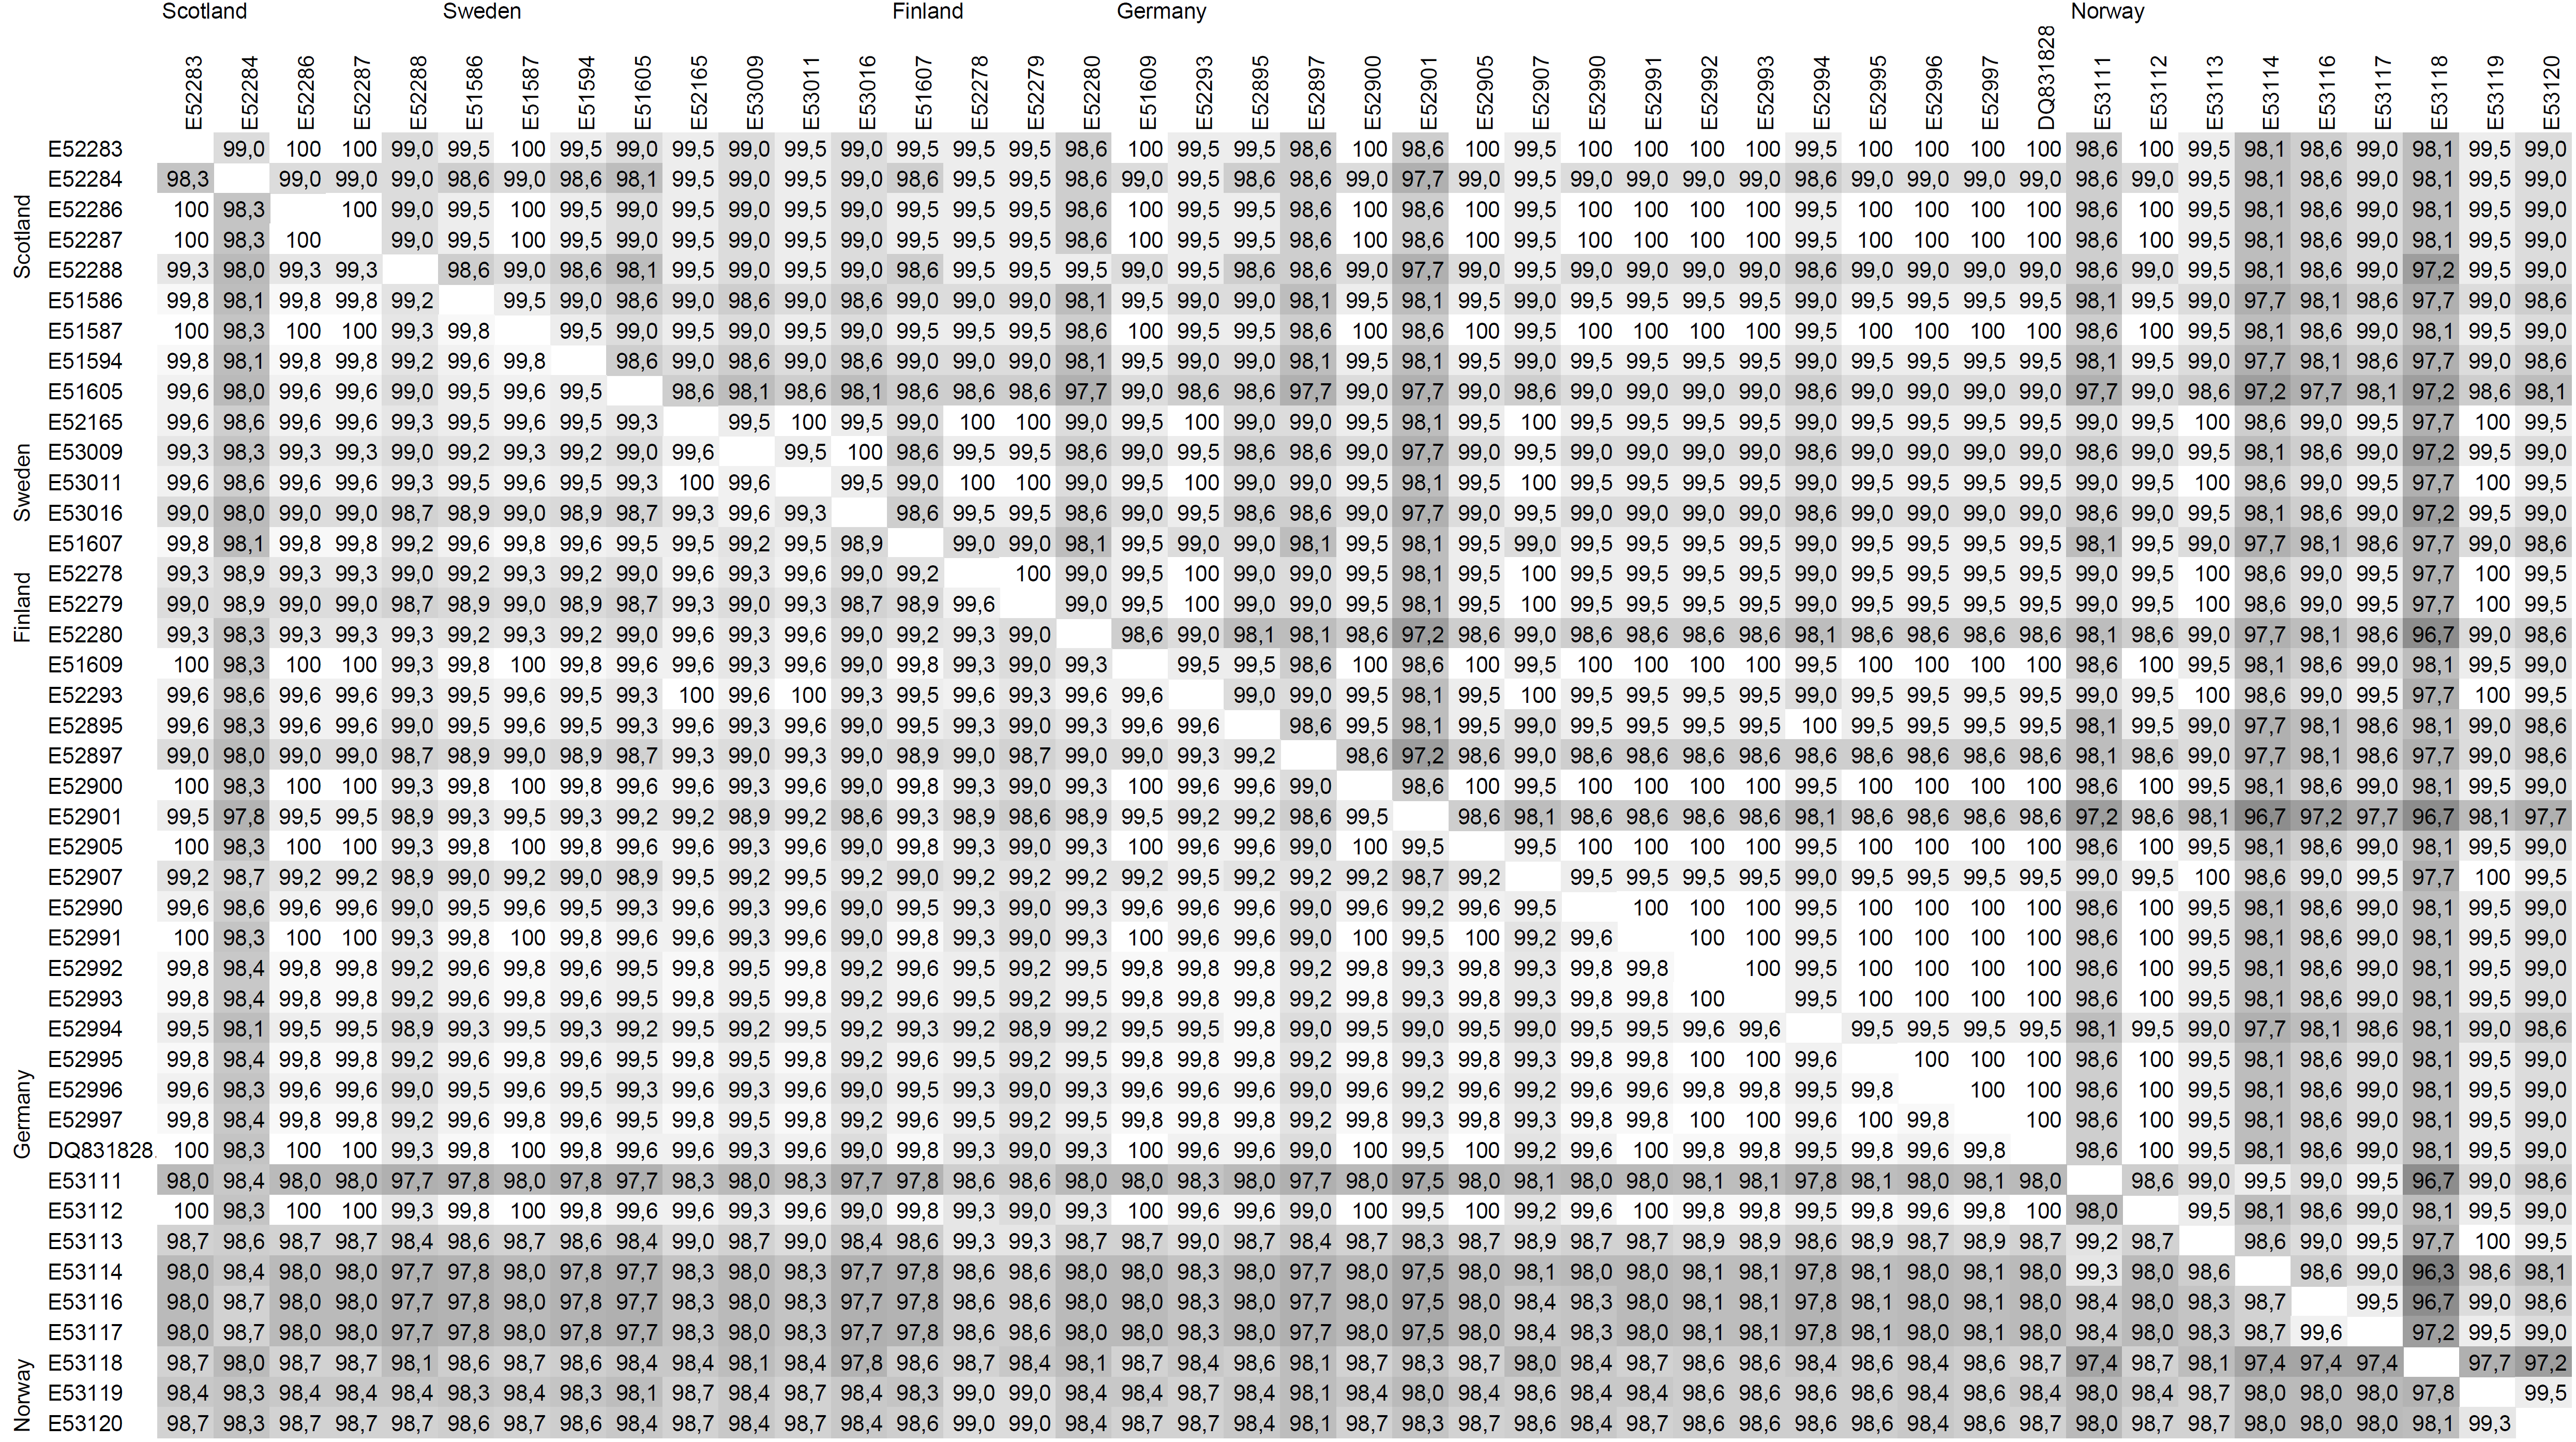


**Figure S4.** Nucleotide sequence identity matrix of p4 protein (lower diagonal), and amino acid sequence identity matrix of p4 protein (upper diagonal) of *European mountain ash ringspot-associated virus*; low values in grey, high values in white.


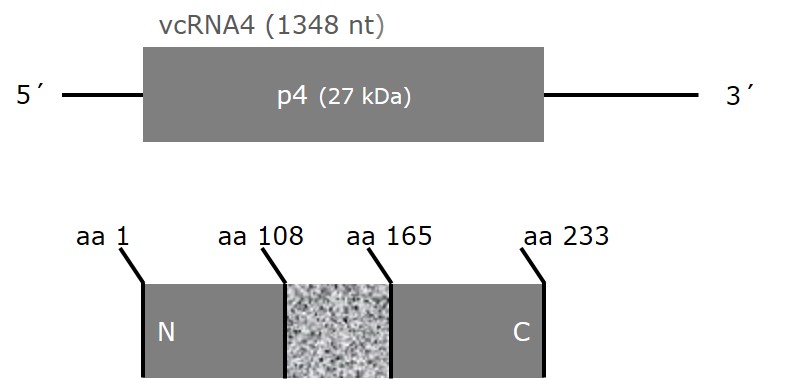


**Figure S5.** Schematic representation of viral copy RNA 4 (vcRNA4) of the EMARaV. Translated p4 protein with conserved N- and C-termini as well as a variable core between amino acid 108 and 165.

© 2015 by the authors; licensee MDPI, Basel, Switzerland. This article is an open access article distributed under the terms and conditions of the Creative Commons Attribution license (http://creativecommons.org/licenses/by/4.0/).
